# Supplementary material for: Hierarchical Ti1−xZrxO2−y nanocrystals with exposed high energy facets showing co-catalyst free solar light driven water splitting and improved light to energy conversion efficiency
Source: Royal Society of Chemistry journal article supplement (doi:10.1039/c7ta04702a), 2017-01-01
Supplement: c7ta04702a1.pdf [file c7ta04702a1.pdf]

Electronic Supplementary Information (ESI)

Hierarchical  $\text{Ti}_{1-x}\text{Zr}_x\text{O}_{2-y}$  nanocrystals with exposed high energy facets showing co-catalyst free solar light driven water splitting and improved light to energy conversion efficiency

Shreyasi Chattopadhyay,<sup>a</sup> Swastik Mondal<sup>b</sup> and Goutam De<sup>\*a,b</sup>

<sup>a</sup>Nano-Structured Materials Division, CSIR-Central Glass and Ceramic Research institute, 196, Raja S. C. Mullick Road, Kolkata-700032.

<sup>b</sup>Advanced Materials Characterization Unit, CSIR-Central Glass and Ceramic Research Institute, 196, Raja S. C. Mullick Road, Kolkata-700032.

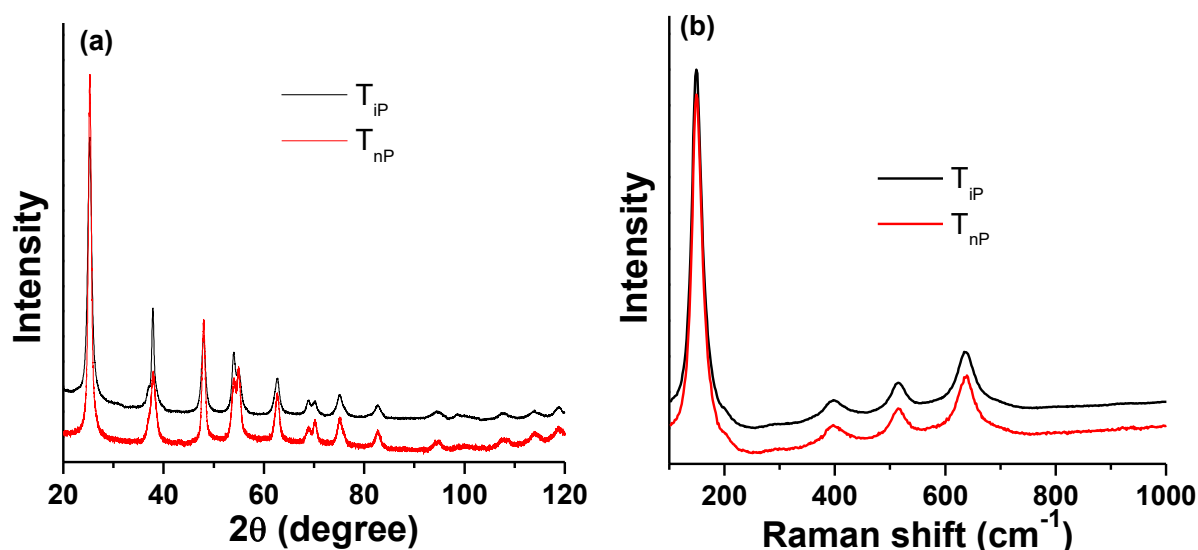

Fig. S1 (a) XRD and (b) Raman spectra of control  $\text{TiO}_2$  samples  $T_{nP}$  and  $T_{iP}$ .

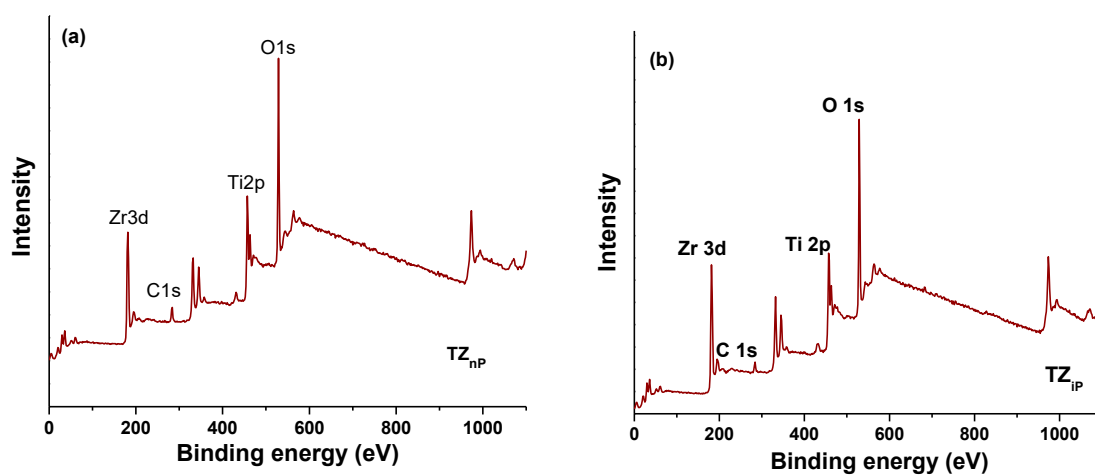

Fig. S2 XPS surface survey scan of (a)  $TZ_{nP}$  and (b)  $TZ_{iP}$ .

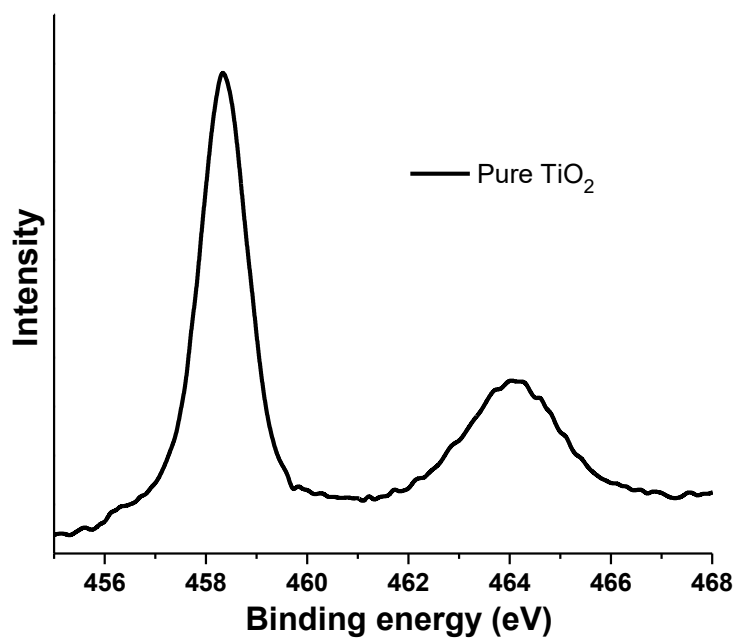

Fig. S3 XPS analysis of unmodified pure  $TiO_2$  ( $T_{nP}/T_{iP}$ ).

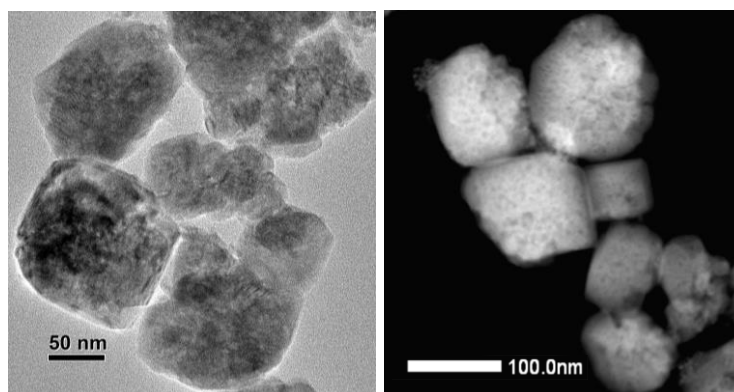

Fig. S4 (a) Bright field and (b) dark field TEM images of  $TZ_{nP}$  showing the mesoporosity present in the cubic morphology.

Table S1 Crystallographic data obtained from the PXRD data collected using Cu  $K\alpha$  ( $\lambda = 1.5406 \text{ \AA}$ ) rotating anode within  $2\theta$  range of  $10\text{-}120^\circ$  and scan rate of  $0.12^\circ/\text{minute}$

| Sample    | Chemical Formula                | Lattice parameters                                                                                                       | Reliability Factors                     | Atomic coordinates and thermal parameters                                                              |                                                                                             |
|-----------|---------------------------------|--------------------------------------------------------------------------------------------------------------------------|-----------------------------------------|--------------------------------------------------------------------------------------------------------|---------------------------------------------------------------------------------------------|
|           |                                 |                                                                                                                          |                                         | Ti/Zr                                                                                                  | O                                                                                           |
| $TZ_{nP}$ | $Ti_{0.665}Zr_{0.335}O_{1.955}$ | Crystal family:<br>Tetragonal<br>(space group:<br>$I4_1/amd$ )<br>$a=3.8502(2) \text{ \AA}$<br>$c=9.8951(7) \text{ \AA}$ | $R_p=3.04$<br>$wR_p=4.68$<br>$GoF=4.24$ | $x=0.5$<br>$y=0.5$<br>$z=0$<br>$U_{iso}=0.0065(5)$<br>Atom site occupancy:<br>$1[0.665(14)/0.335(14)]$ | $x=0.5$<br>$y=0$<br>$z=0.0411(2)$<br>$U_{iso}=0.0021(16)$<br>Atom site<br>occupancy: 0.9775 |
| $TZ_{iP}$ | $Ti_{0.912}Zr_{0.088}O_{1.963}$ | Crystal family:<br>Tetragonal<br>(space group:<br>$I4_1/amd$ )<br>$a=3.8290(2) \text{ \AA}$<br>$c=9.7560(7) \text{ \AA}$ | $R_p=1.58$<br>$wR_p=2.17$<br>$GoF=1.99$ | $x=0.5$<br>$y=0.5$<br>$z=0$<br>$U_{iso}=0.0029(7)$<br>Atom site occupancy:<br>$1[0.912(14)/0.088(14)]$ | $x=0.5$<br>$y=0$<br>$z=0.0383(3)$<br>$U_{iso}=0.014(2)$<br>Atom site<br>occupancy: 0.9815   |

Table S2 Bond distances and angles between atoms in comparison to Horn et. al. (ref 39)

| Sample                                                                            | Ti/Zr–O (Å) | Ti/Zr–O $\parallel$ [001] (Å) | O–O (Å)    | O–O shared edge (Å) | Nearest Ti/Zr–Ti/Zr (Å) | O–Ti/Zr–O (°) |
|-----------------------------------------------------------------------------------|-------------|-------------------------------|------------|---------------------|-------------------------|---------------|
| TZ <sub>nP</sub><br>(Ti <sub>0.665</sub> Zr <sub>0.335</sub> O <sub>1.955</sub> ) | 1.9675(5)   | 2.067(2)                      | 2.543(2)   | 2.8413(10)          | 3.1346(3)               | 101.92(7)     |
| TZ <sub>iP</sub><br>(Ti <sub>0.912</sub> Zr <sub>0.088</sub> O <sub>1.963</sub> ) | 1.9506(6)   | 2.065(3)                      | 2.555(3)   | 2.8088(11)          | 3.1007(3)               | 101.04(8)     |
| Anatase TiO <sub>2</sub><br>(Horn et. al.)                                        | 1.9338(5)   | 1.9797(23)                    | 2.4658(29) | 2.7924(13)          | 3.0394(2)               | 101.90(7)     |

### S1. Calculation of light to power conversion efficiency ( $\eta$ ):

The overall solar light to power conversion efficiency ( $\eta$ ) for a solar cell is defined in terms of the photocurrent density i.e. short-circuit current ( $J_{sc}$ ), open-circuit photovoltage ( $V_{oc}$ ), fill factor of the cell ( $ff$ ) and intensity of the incident light ( $P_{in}$ ). The following equation was used to calculate the efficiency value.

$$\begin{aligned} \eta &= \frac{\text{output power}}{\text{Input power}} \times 100 (\%) \\ &= \frac{P_{max} (mW cm^{-2})}{P_{in} (mW cm^{-2})} \times 100 (\%) \\ &= \frac{J_{sc} (mA cm^{-2}) \times V_{oc} (V) \times ff}{\text{incident light intensity} (mW cm^{-2})} \times 100 (\%); [P_{in} = 100 mW cm^{-2} \text{ for 1 Sun condition}] \\ &= J_{sc} (mA cm^{-2}) \times V_{oc} (V) \times ff (\%) \end{aligned}$$
